# Supplementary material for: Changes in Etiologies of Hospitalized Patients with Liver Cirrhosis in Beijing 302 Hospital from 2002 to 2013
Source: Hindawi journal article supplement (doi:10.1155/2017/5605981), 2017-01-01
Supplement: f2 [file 5605981.f2.pdf]

**Supplemental Table 1. The constituent ratio of different cirrhotic patients from  
2002 to 2013**

|      | Hepatitis B<br>cirrhosis | Hepatitis C<br>cirrhosis | Alcoholic<br>cirrhosis | Autoimmune<br>cirrhosis |
|------|--------------------------|--------------------------|------------------------|-------------------------|
| 2002 | 81.53                    | 6.39                     | 3.34                   | 2.77                    |
| 2003 | 81.85                    | 5.47                     | 3.56                   | 3.29                    |
| 2004 | 81.73                    | 6.15                     | 4.45                   | 2.83                    |
| 2005 | 81.55                    | 7.35                     | 4.43                   | 2.91                    |
| 2006 | 79.90                    | 8.71                     | 4.13                   | 3.08                    |
| 2007 | 76.00                    | 11.00                    | 5.74                   | 3.39                    |
| 2008 | 73.62                    | 11.77                    | 5.77                   | 4.50                    |
| 2009 | 72.61                    | 11.76                    | 5.82                   | 5.06                    |
| 2010 | 70.01                    | 13.14                    | 7.07                   | 4.19                    |
| 2011 | 66.84                    | 13.91                    | 7.74                   | 4.87                    |
| 2012 | 65.00                    | 13.90                    | 8.00                   | 6.50                    |
| 2013 | 66.00                    | 12.60                    | 8.40                   | 6.80                    |

**Supplemental table 2. The constituent ratio of native place for different cirrhotic  
patients**

|                                  | Central<br>China | North China       | Northeast<br>China | Northwest China |
|----------------------------------|------------------|-------------------|--------------------|-----------------|
| Hepatitis B cirrhosis            | 8482<br>(14.44%) | 22469<br>(38.25%) | 9998<br>(17.02%)   | 2802<br>(4.77%) |
| Hepatitis C cirrhosis            | 1608<br>(16.70%) | 3129<br>(32.50%)  | 2786<br>(28.94%)   | 408<br>(4.24%)  |
| Alcoholic cirrhosis              | 535<br>(9.69%)   | 2324<br>(42.13%)  | 849<br>(15.39%)    | 156<br>(2.83%)  |
| Autoimmune<br>liver<br>cirrhosis | 515<br>(12.63%)  | 1626<br>(39.86%)  | 559<br>(13.70%)    | 167<br>(4.09%)  |
